# Supplementary material for: Chromatin remodeling gene AT-rich interactive domain-containing protein 1A suppresses gastric cancer cell proliferation by targeting PIK3CA and PDK1
Source: PubMed Central journal article supplement (PMC5216786; doi:10.18632/oncotarget.10060), 2016-06-15
Supplement: oncotarget-07-46127-s001.pdf [file oncotarget-07-46127-s001.pdf]

## Chromatin remodeling gene AT-rich interactive domain-containing protein 1A suppresses gastric cancer cell proliferation by targeting *PIK3CA* and *PDK1*

### SUPPLEMENTARY FIGURES AND TABLES

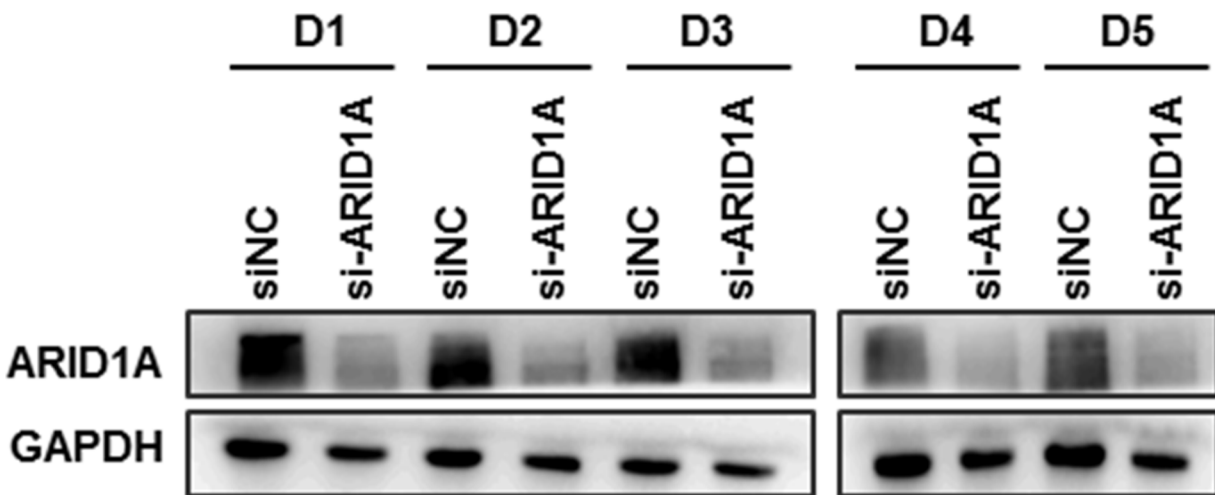

**Supplementary Figure S1: Western blot analysis of ARID1A expression in SGC-7901 cells after silencing with a siRNA at different time point.** SGC-7901 cells were transfected with a siRNA targeting *ARID1A* after plating for 24 hrs. After a further culture of 24 hrs, the cells were seeded onto a 96-well plate for growth assay. siNC, negative control of transfection by a scramble siRNA. D1, 24 hrs after transfection.

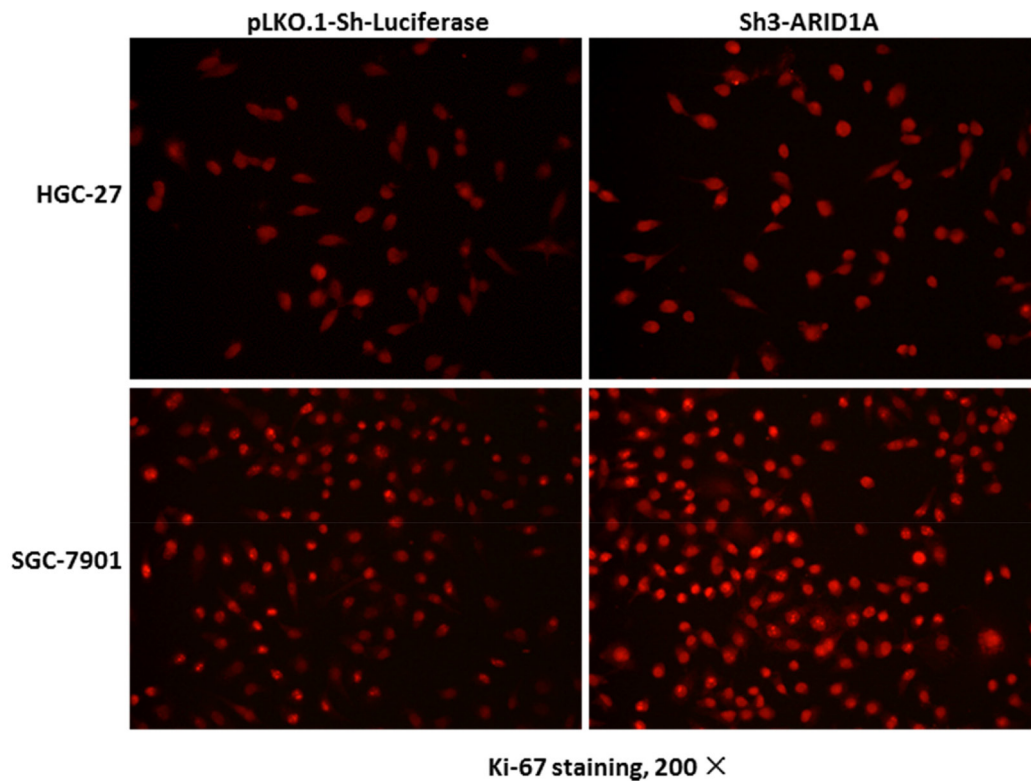

**Supplementary Figure S2: Ki-67 staining of gastric cancer cells after *ARID1A* was silenced with a shRNA.** Sh-Luciferase was served as a negative control. The exposure was set at the same condition throughout all images.

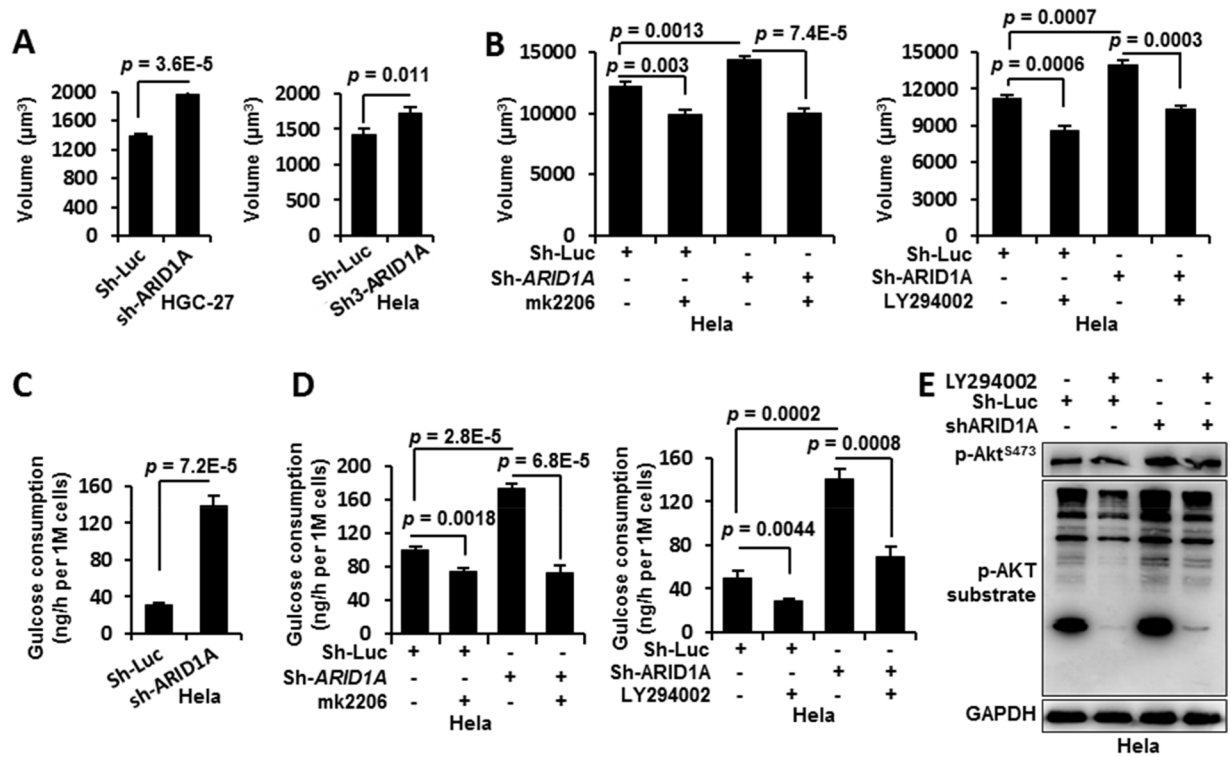

**Supplementary Figure S3: *ARID1A* silencing promotes GC cell growth by targeting PI3K/AKT pathway.** **A.** *ARID1A* was silenced in HGC-27 and HeLa cells and cell volume was measured. **B.** HeLa cell volume was increased by *ARID1A* silencing but was reduced by mk2206 and LY294002 treatment. **C.** Glucose consumption was increased in HeLa cells by *ARID1A* knockdown. **D.** Glucose uptake was increased by *ARID1A* silencing but was inhibited by mk2206 and LY294002 treatment. **E.** The activity of the substrate of p-AKT was analyzed in HeLa cells with *ARID1A*-deficiency.

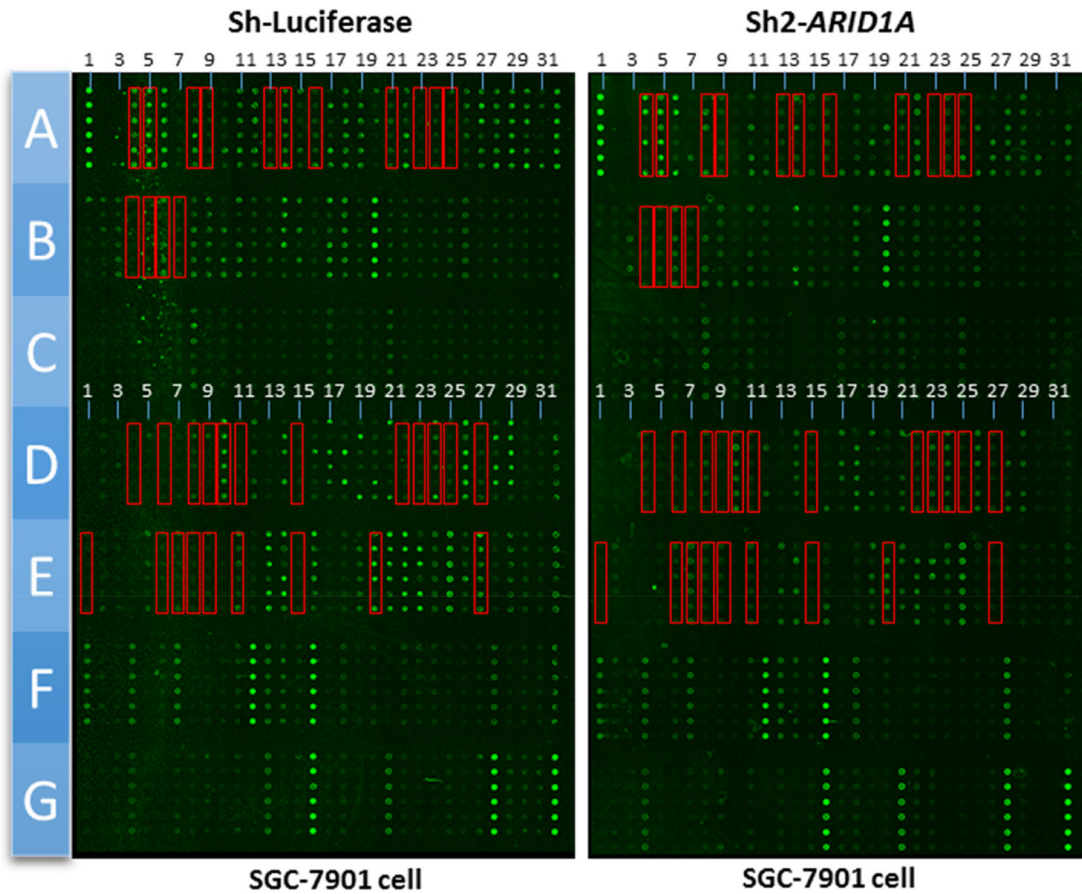

**Supplementary Figure S4: AKT/PKB phospho antibody array analysis of gastric cancer cells with *ARID1A* silencing.** Sh-Luciferase was served as a negative control. The immno reaction and scanning conditions for the two arrays were set at the same condition. The spots highlighted with red blocks were phosphorylated proteins with prominent changes.

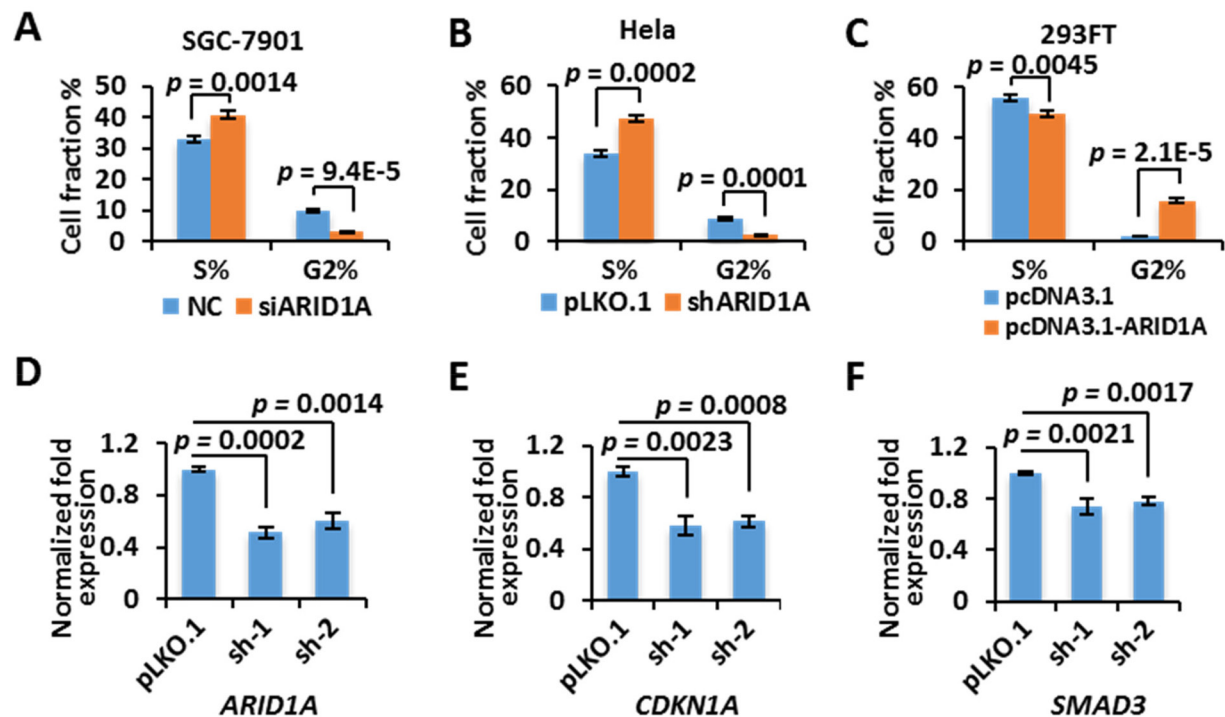

**Supplementary Figure S5: The modulation role of gastric cancer cell cycle by *ARID1A*.** **A.** *ARID1A* was silenced in SGC-7901 by a siRNA and the cell cycle changes were measured using flow cytometry. NC, negative control using a scrambled siRNA. **B.** *ARID1A* was depleted in HeLa cell with a shRNA and the cell cycle changes were analyzed. pLKO.1 indicates a control silencing against luciferase. **C.** *ARID1A* was ectopically expressed in 293FT cell and the cell cycle changes were analyzed. *p* values were calculated using two-sided Student's *t* test based on triplicate experiments and a *p* value < 0.05 was considered as statistically significant. **D.** qPCR analysis of *ARID1A* in HGC-27 cells stably transfected with shRNAs against *ARID1A* (sh1 and sh2). pLKO.1 indicates a control silencing against luciferase. **E.** qPCR analysis of the expression of *cyclin-dependent kinase inhibitor 1A* (*CDKN1A*), which encodes a tumor suppressor, p21. **F.** qPCR analysis of *SMAD family member 3* (*SMAD3*) after *ARID1A* was silenced in HGC-27 cells. *p* values were calculated using two-sided Student's *t* test based on triplicate experiments and a *p* value < 0.05 was considered as statistically significant.

**Supplementary Table S1: Primers, siRNAs and shRNAs**

See Supplementary File 1

Supplementary Table S2: Antibodies used in current study

| Cat No.    | Company    | Antibody                                 | Clone | Animal host |
|------------|------------|------------------------------------------|-------|-------------|
| 9234       | CST        | PHOSPHO-p70S6K(Thr389)                   | 108D2 | Rabbit      |
| 2708       | CST        | p70 S6 Kinase                            | 49D7  | Rabbit      |
| 2971       | CST        | Phospho-mTOR (Ser2448)                   | -     | Rabbit      |
| 2972       | CST        | mTOR                                     | -     | Rabbit      |
| 8566       | CST        | Phospho-GSK-3 $\alpha/\beta$ (Ser21/9)   | D17D2 | Rabbit      |
| 5676       | CST        | GSK-3 $\alpha/\beta$                     | D75D3 | Rabbit      |
| 4060       | CST        | Phospho-Akt (Ser473)                     | D9E   | Rabbit      |
| 4056       | CST        | Phospho-Akt (Thr308)                     | 244F9 | Rabbit      |
| 9611       | CST        | Phospho-(Ser/Thr) Akt Substrate Antibody | -     | Rabbit      |
| 4691       | CST        | Akt (pan)                                | C67E7 | Rabbit      |
| 2947       | CST        | p21 Waf1/Cip1                            | 12D1  | Rabbit      |
| 3061       | CST        | Phospho-PDK1 (Ser241)                    | -     | Rabbit      |
| 3062       | CST        | PDK1                                     | -     | Rabbit      |
| 18262-1-AP | PTG lab    | PDK1                                     | -     | Rabbit      |
| 20583-1-AP | PTG lab    | PI3K                                     | -     | Rabbit      |
| 21829-1-AP | PTG lab    | GLUT1                                    | -     | Rabbit      |
| SC-7938    | Santa Cruz | GLUT4                                    | H-61  | Rabbit      |
| sc-10768   | Santa Cruz | BRG1                                     | H-88  | Rabbit      |
| HPA005456  | Sigma      | ARID1A                                   | -     | Rabbit      |
| sc-23900   | Santa Cruz | Ki-67                                    | -     | Mouse       |
| 06912c     | CWBIO      | GAPDH                                    | -     | Mouse       |
| 66008-1-Ig | PTG lab    | Flag                                     | -     | Mouse       |
| sc-2005    | Santa Cruz | goat anti-mouse IgG-HRP                  | -     | Goat        |
| sc-2004    | Santa Cruz | goat anti-rabbit IgG-HRP                 | -     | Goat        |

Supplementary Table S3: Phospho-protein antibody array analysis of SGC-7901 cells with *ARID1A* silencing

| Block <sup>1</sup> | Column <sup>1</sup> | Name                                 | Sh-Luciferase <sup>2</sup> | Sh2- <i>ARID1A</i> <sup>2</sup> | Fold of change | <i>p</i> value <sup>3</sup> |
|--------------------|---------------------|--------------------------------------|----------------------------|---------------------------------|----------------|-----------------------------|
| 5                  | 8                   | 14-3-3 theta/tau (Ser232)            | 76.33                      | 277.24                          | 3.63           | 3.40E-07                    |
| 5                  | 9                   | 14-3-3 zeta/delta (Thr232)           | 84.83                      | 272.54                          | 3.21           | 3.15E-05                    |
| 1                  | 8                   | AKT (Ser473)                         | 261.67                     | 882.62                          | 3.37           | 3.50E-04                    |
| 1                  | 9                   | AKT (Thr308)                         | 83.17                      | 433.24                          | 5.21           | 2.13E-08                    |
| 4                  | 9                   | AKT1 (Ser124)                        | 34.40                      | 91.63                           | 2.66           | 3.07E-04                    |
| 4                  | 8                   | AKT1 (Thr450)                        | 125.00                     | 335.98                          | 2.69           | 3.23E-02                    |
| 4                  | 15                  | AKT1S1 (Thr246)                      | 68.33                      | 285.70                          | 4.18           | 9.06E-10                    |
| 5                  | 15                  | BAD (Ser134)                         | 63.67                      | 156.95                          | 2.47           | 1.26E-07                    |
| 1                  | 16                  | BAD (Ser136)                         | 110.60                     | 430.90                          | 3.90           | 5.23E-06                    |
| 1                  | 14                  | BCL-2 (Ser70)                        | 247.40                     | 571.39                          | 2.31           | 1.90E-02                    |
| 1                  | 13                  | BCL-2 (Thr56)                        | 121.00                     | 343.42                          | 2.84           | 5.13E-04                    |
| 5                  | 11                  | BCL-2 (Thr69)                        | 202.67                     | 367.30                          | 1.81           | 9.04E-03                    |
| 4                  | 10                  | Cyclin D1 (Thr286)                   | 413.00                     | 874.01                          | 2.12           | 4.66E-05                    |
| 4                  | 11                  | FAK (Tyr576)                         | 47.17                      | 234.01                          | 4.96           | 1.66E-07                    |
| 1                  | 4                   | GSK3 beta (Ser9)                     | 535.60                     | 1426.14                         | 2.66           | 6.53E-05                    |
| 4                  | 4                   | GSK3 $\alpha$ - $\beta$ (Tyr216/279) | 35.50                      | 245.52                          | 6.92           | 3.10E-11                    |
| 4                  | 22                  | MDM2 (Ser166)                        | 84.83                      | 338.33                          | 3.99           | 3.46E-06                    |
| 2                  | 7                   | mTOR (Ser2448)                       | 92.83                      | 278.65                          | 3.00           | 7.50E-09                    |
| 5                  | 6                   | mTOR (Ser2481)                       | 57.67                      | 277.63                          | 4.81           | 9.03E-04                    |
| 5                  | 19                  | mTOR (Thr2446)                       | 199.40                     | 535.68                          | 2.69           | 4.26E-03                    |
| 2                  | 4                   | p21Cip1 (Thr145)                     | 70.17                      | 184.43                          | 2.63           | 2.97E-06                    |
| 2                  | 5                   | p27Kip1 (Ser10)                      | 68.50                      | 336.92                          | 4.92           | 7.28E-08                    |
| 2                  | 6                   | p27Kip1 (Thr187)                     | 297.50                     | 716.59                          | 2.41           | 3.37E-05                    |
| 1                  | 21                  | p53 (Ser15)                          | 123.33                     | 395.10                          | 3.20           | 3.55E-03                    |
| 4                  | 23                  | p53 (Ser20)                          | 100.67                     | 450.32                          | 4.47           | 6.53E-04                    |
| 1                  | 23                  | p53 (Ser33)                          | 55.50                      | 113.72                          | 2.05           | 8.73E-07                    |
| 1                  | 24                  | p53 (Ser37)                          | 105.40                     | 419.38                          | 3.98           | 6.83E-05                    |
| 4                  | 24                  | p53 (Ser392)                         | 190.17                     | 659.42                          | 3.47           | 4.90E-05                    |
| 1                  | 25                  | p53 (Ser46)                          | 70.00                      | 304.96                          | 4.36           | 2.18E-06                    |
| 5                  | 7                   | p53 (Thr81)                          | 109.00                     | 597.71                          | 5.48           | 2.51E-07                    |
| 4                  | 25                  | p70S6K (Thr229)                      | 93.60                      | 204.41                          | 2.18           | 5.22E-05                    |
| 4                  | 27                  | p70S6K (Thr389)                      | 99.83                      | 271.60                          | 2.72           | 2.92E-05                    |
| 4                  | 6                   | p70S6K (Thr421)                      | 61.20                      | 250.61                          | 4.09           | 7.83E-03                    |
| 1                  | 5                   | PKD1 (Ser241)                        | 615.50                     | 1427.31                         | 2.32           | 6.26E-05                    |
| 5                  | 1                   | Tuberin/TSC2 (Thr1462)               | 36.67                      | 70.09                           | 1.91           | 1.29E-02                    |
| 5                  | 27                  | XIAP (Ser87)                         | 347.00                     | 124.05                          | 0.36           | 1.95E-04                    |

The experiment was performed by Wayen Biotechnologies (Shanghai), Inc., using the Full Moon AKT/PKB phospho antibody array (Full Moon BioSystems, Inc.).

<sup>1</sup>The block and column define the position of spots of proteins analyzed. These positions were highlighted in Supplementary Figure 4.

<sup>2</sup>The values were normalization with actin.

<sup>3</sup>The *p* value was calculated using two-sided Student's *t* test and *p* < 0.05 was considered as statistically significant.
